# Supplementary material for: Facile synthesis of MoO2/CaSO4 composites as highly efficient adsorbents for congo red and rhodamine B
Source: Royal Society of Chemistry journal article supplement (doi:10.1039/c7ra11292k), 2018-01-01
Supplement: c7ra11292k1.pdf [file c7ra11292k1.pdf]

## Electronic Supplementary Information (ESI)

### Facile synthesis of $\text{MoO}_2/\text{CaSO}_4$ composites as highly efficient adsorbents for Congo red and Rhodamine B

Xin-Jian Jia, Jinshu Wang,\* Junshu Wu, Weili Teng, Bingxin Zhao, Hongyi Li and Yucheng Du

Key Laboratory of Advanced Functional Materials for Ministry of Education, College of Materials Science and Engineering, Beijing University of Technology, Beijing 100124, China. E-mail: [wangjsh@bjut.edu.cn](mailto:wangjsh@bjut.edu.cn)

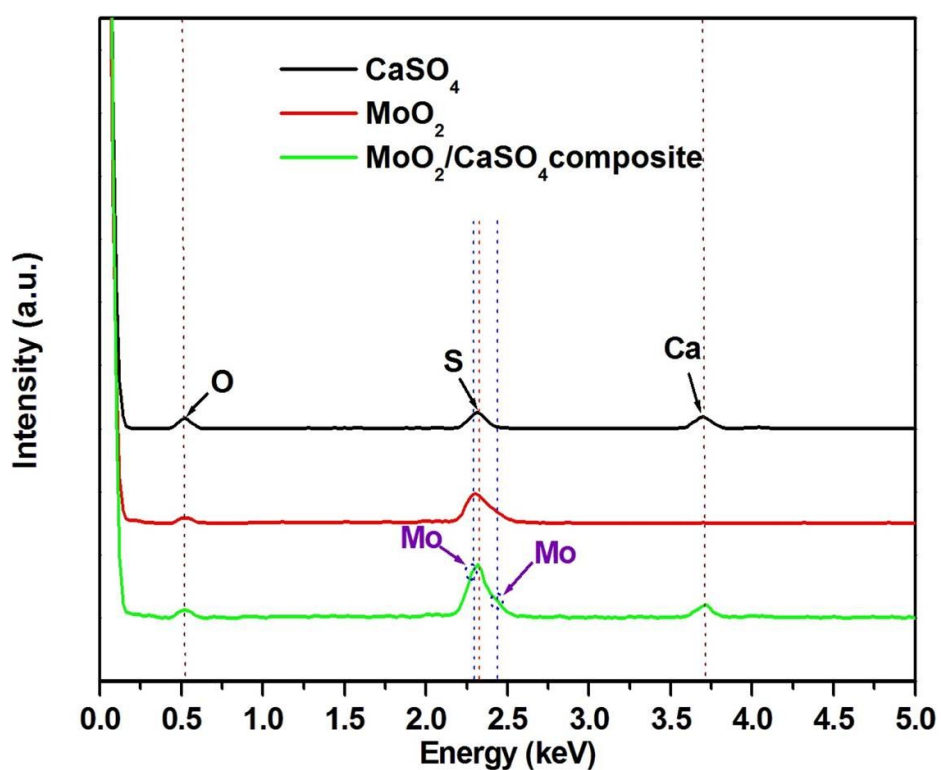

**Fig. S1.** EDX patterns of  $\text{CaSO}_4$ ,  $\text{MoO}_2$  and  $\text{MoO}_2/\text{CaSO}_4$  composites.

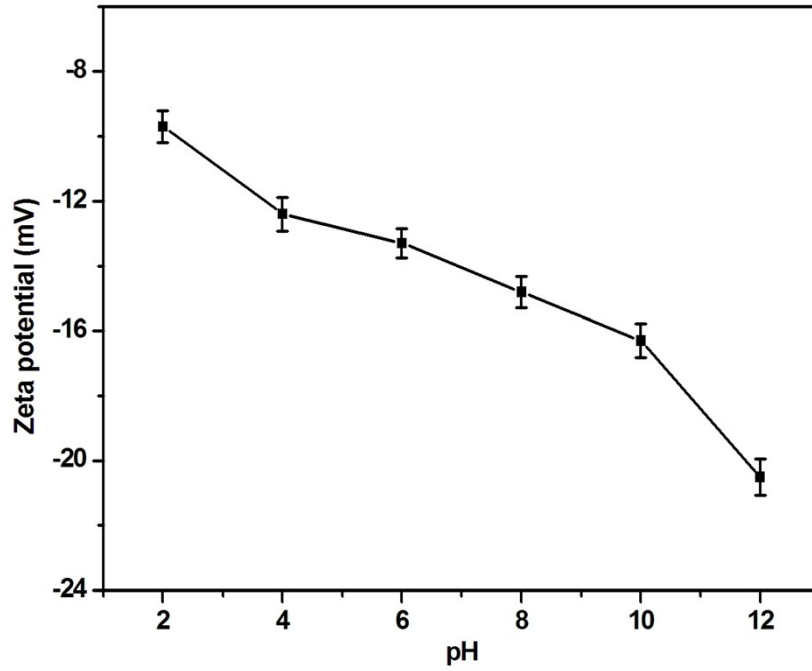

**Fig. S2** Zeta potential values of the MoO<sub>2</sub>/CaSO<sub>4</sub> composite over a pH range between 2.0 and 12.0.

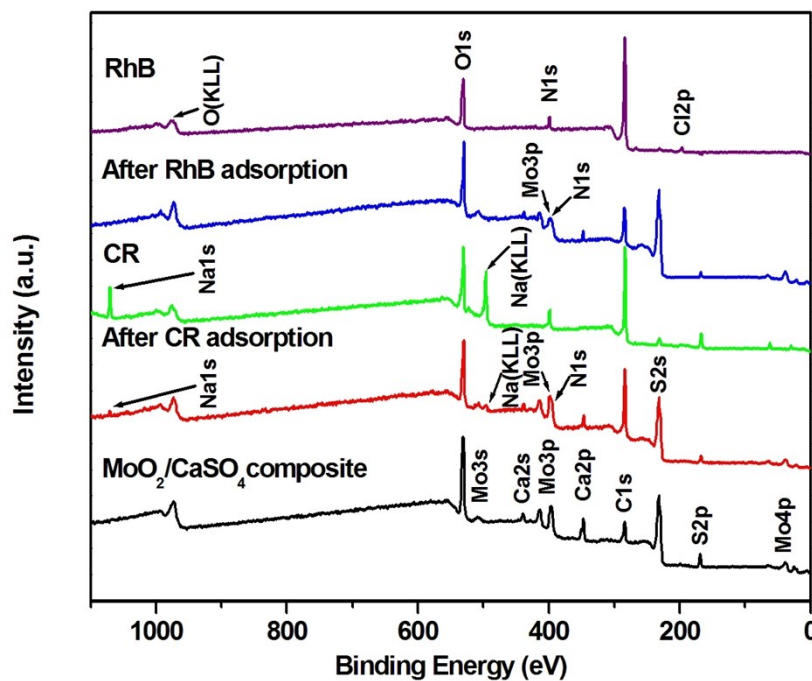

**Fig. S3.** XPS survey scan spectra of MoO<sub>2</sub>/CaSO<sub>4</sub> composites, MoO<sub>2</sub>/CaSO<sub>4</sub> composites after CR adsorption, CR, MoO<sub>2</sub>/CaSO<sub>4</sub> composites after RhB adsorption and RhB.

**Eq. S1.** Equation for the removal efficiency ( $R_e$ ) of a dye onto an adsorbent.

$$R_e = \frac{C_0 - C_t}{C_0} \times 100\%$$

$C_0$  ( $\text{mg}\cdot\text{L}^{-1}$ ) is the initial concentration of a dye solution;  $C_t$  ( $\text{mg}\cdot\text{L}^{-1}$ ) is the dye concentration at time  $t$ .

**Eq. S2.** Equation for the adsorption capacity ( $q_e$ ,  $\text{mg}\cdot\text{g}^{-1}$ ) of a dye onto an adsorbent at equilibrium.

$$q_e = \frac{C_0 - C_e}{m} V$$

$C_e$  ( $\text{mg}\cdot\text{L}^{-1}$ ) is the equilibrium concentration of a dye solution;  $m$  (g) is the mass of an adsorbent; and  $V$  (L) is the volume of a dye solution.

**Eq. S3.** Equation for the adsorption quantity ( $q_t$ ,  $\text{mg}\cdot\text{g}^{-1}$ ) of a dye onto an adsorbent at time  $t$ .

$$q_t = \frac{C_0 - C_t}{m} V$$

**Eq. S4.** Equation for the Langmuir model.

$$\frac{C_e}{q_e} = \frac{C_e}{q_{max}} + \frac{1}{q_{max}k_L}$$

In this model,  $q_{max}$  ( $\text{mg}\cdot\text{g}^{-1}$ ) and  $k_L$  ( $\text{L}\cdot\text{mg}^{-1}$ ) are Langmuir isotherm constants separately representing the maximum adsorbed quantity and a function associated with the adsorption free energy.

**Eq. S5.** Equation for the separation factor  $R_L$ .

$$R_L = \frac{1}{1 + k_L C_0}$$

**Eq. S6.** Equation for the Freundlich model.

$$\ln q_e = \ln k_F + \frac{1}{n} \ln C_e$$

In this model,  $k_F$  ( $(\text{mg}\cdot\text{g}^{-1})(\text{L}\cdot\text{mg}^{-1})^{1/n}$ ) and  $n$  are Freundlich isotherm coefficients, which are separately related to the adsorption capability and the adsorption intensity.

**Eq. S7.** Equation for the D–R model.

$$\ln q_e = \ln q_m - k_D \varepsilon^2$$

In this model,  $q_m$  ( $\text{mg}\cdot\text{g}^{-1}$ ) and  $k_D$  ( $\text{mol}^2\cdot\text{kJ}^{-2}$ ) are the D–R isotherm constants related to the maximum adsorption quantity and the mean adsorption free energy, respectively.

**Eq. S8.** Equation for the Polanyi potential  $\varepsilon$ .

$$\varepsilon = RT \ln \left( 1 + \frac{1}{C_e} \right)$$

In this model,  $R$  ( $8.314 \text{ J}\cdot\text{mol}^{-1}\cdot\text{K}^{-1}$ ) is the molar gas constant, and  $T$  is the absolute temperature expressed in K.

**Eq. S9.** Equation for the mean adsorption free energy.

$$E = \frac{1}{\sqrt{2k_D}}$$

**Eq. S10.** Equation for the Temkin model.

$$q_e = \frac{RT}{b} \ln k_T + \frac{RT}{b} \ln C_e$$

In this model,  $b$  (equal to  $-\Delta H$ ,  $\text{kJ}\cdot\text{mol}^{-1}$ ) denotes the adsorption heat, and  $k_T$  ( $\text{L}\cdot\text{mg}^{-1}$ ) is the Temkin isotherm constant.

**Eq. S11.** Equation for the Gibb's free energy  $\Delta G^0$ .

$$\Delta G^0 = -RT \ln Kq$$

In this equation,  $R$  ( $8.314 \text{ J}\cdot\text{mol}^{-1}\cdot\text{K}^{-1}$ ) is the molar gas constant,  $T$  is the absolute temperature expressed in K, and  $K_q$  ( $\text{L}\cdot\text{g}^{-1}$ ) is the distribution coefficient of an

adsorbent that equals to  $q_e \cdot C_e^{-1}$ .

**Eq. S12.** Equation for the  $\ln Kq$ .

$$\ln Kq = \frac{\Delta S^0}{R} - \frac{\Delta H^0}{RT}$$

**Eq. S13.** Equation for the pseudo-first-order kinetic model.

$$\log(q_e - q_t) = \log q_e - \frac{k_1}{2.303} t$$

In this model,  $k_1$  ( $\text{min}^{-1}$ ) represents the kinetic rate constant of the pseudo-first-order adsorption.

**Eq. S14.** Equation for the pseudo-second-order kinetic model.

$$\frac{t}{q_t} = \frac{1}{k_2 q_e^2} + \frac{1}{q_e} t$$

In this model,  $k_2$  ( $\text{g} \cdot \text{mg}^{-1} \cdot \text{min}^{-1}$ ) denotes the rate constant of the pseudo-second-order adsorption.

**Eq. S15.** Equation for the Elovich kinetic model.

$$q_t = \frac{1}{\beta} \ln(\alpha\beta) + \frac{1}{\beta} \ln t$$

In this model,  $\alpha$  ( $\text{mg} \cdot \text{g}^{-1} \cdot \text{min}^{-1}$ ) refers to the initial adsorption rate, and  $\beta$  ( $\text{g} \cdot \text{mg}^{-1}$ ) represents the Elovich desorption constant.

**Eq. S16.** Equation for the intra-particle diffusion model.

$$q_t = k_{id} t^{0.5} + C_i$$

In this model,  $k_{id}$  ( $\text{mg} \cdot \text{g}^{-1} \cdot \text{min}^{-1/2}$ ) denotes the kinetic rate constant of the intra-particle diffusion at stage  $i$ , and  $C_i$  is a constant whose value directly affects the boundary layer thickness of molecular diffusion.

**Table S1.** Chemical composition of FDG gypsum confirmed by XRF analysis.

| Material   | Content/ wt.% |       |      |      |      |      |      |      |      |      |      |
|------------|---------------|-------|------|------|------|------|------|------|------|------|------|
|            | Ca            | S     | Si   | Mg   | Al   | F    | Fe   | K    | Na   | Cl   | P    |
| FGD gypsum | 59.78         | 26.17 | 4.18 | 4.03 | 1.81 | 1.34 | 1.29 | 0.57 | 0.35 | 0.34 | 0.14 |

**Table S2.** Chemical composition of FDG gypsum confirmed by EDX analysis.

| Material   | Content/ wt.% |       |       |      |      |      |      |
|------------|---------------|-------|-------|------|------|------|------|
|            | O             | Ca    | S     | Mg   | Si   | Al   | Fe   |
| FGD gypsum | 55.77         | 24.43 | 13.24 | 3.12 | 1.68 | 0.91 | 0.85 |

**Table S3.** Chemical composition of the purified FDG gypsum confirmed by EDX analysis.

| Material                | Content/ wt.% |       |       |
|-------------------------|---------------|-------|-------|
|                         | O             | Ca    | S     |
| The purified FGD gypsum | 58.15         | 22.27 | 19.58 |

**Table S4.** Isotherm parameters of four different models for the adsorption of CR and RhB onto MoO<sub>2</sub>/CaSO<sub>4</sub> composites.

| Isotherm models/parameters                                         | CR                      | RhB                     |
|--------------------------------------------------------------------|-------------------------|-------------------------|
| Langmuir                                                           |                         |                         |
| $q_{max}$ (mg·g <sup>-1</sup> )                                    | 853.54                  | 86.38                   |
| $k_L$ (L·mg <sup>-1</sup> )                                        | 0.0151                  | 0.1913                  |
| $R^2$                                                              | 0.9979                  | 0.9912                  |
| $R_L$                                                              | 0.027-0.143             | 0.022-0.054             |
| Freundlich                                                         |                         |                         |
| $k_F$ ((mg·g <sup>-1</sup> )(L·mg <sup>-1</sup> ) <sup>1/n</sup> ) | 100.33                  | 49.55                   |
| $n$                                                                | 3.0252                  | 9.1466                  |
| $R^2$                                                              | 0.8587                  | 0.8498                  |
| D-L                                                                |                         |                         |
| $q_m$ (mg·g <sup>-1</sup> )                                        | 703.42                  | 70.25                   |
| $k_D$ (mol <sup>2</sup> ·kJ <sup>-2</sup> )                        | 1.22 x 10 <sup>-4</sup> | 2.13 x 10 <sup>-7</sup> |
| $E$ (kJ·mol <sup>-1</sup> )                                        | 0.0433                  | 1.2654                  |
| $R^2$                                                              | 0.8944                  | 0.7564                  |
| Temkin                                                             |                         |                         |
| $k_T$ (L·mg <sup>-1</sup> )                                        | 0.21                    | 646.77                  |
| $b$ (kJ·mol <sup>-1</sup> )                                        | 0.0144                  | 0.3423                  |
| $R^2$                                                              | 0.9653                  | 0.8501                  |

**Table S5.** An adsorptive capacity comparison of the MoO<sub>2</sub>/CaSO<sub>4</sub> composite with other adsorbents.

| Adsorbents                                        | $q_{\max}$ (mg·g <sup>-1</sup> ) | References |
|---------------------------------------------------|----------------------------------|------------|
| Activated carbon                                  | 6.7 (CR)                         | [40, 41]   |
|                                                   | 39.22 (RhB)                      |            |
| Jute stick powder                                 | 35.7 (CR)                        | [42]       |
|                                                   | 87.7 (RhB)                       |            |
| Kaolinite                                         | 22.99 (CR)                       | [43, 44]   |
|                                                   | 46.08 (RhB)                      |            |
| $\alpha$ -MoO <sub>3</sub> /polyaniline composite | 76.22 (CR)                       | [23]       |
|                                                   | 36.36 (RhB)                      |            |
| MoO <sub>2</sub> /CaSO <sub>4</sub> composite     | 853.54 (CR)                      | This study |
|                                                   | 86.38 (RhB)                      |            |

**Table S6.** Thermodynamic parameters for the adsorption of CR and RhB onto MoO<sub>2</sub>/CaSO<sub>4</sub> composites.

| Samples | $\Delta H^0$ ,<br>kJ·mol <sup>-1</sup> | $\Delta S^0$ , J·mol <sup>-1</sup> ·K <sup>-1</sup> | $\Delta G^0$ , kJ·mol <sup>-1</sup> |        |        |        |        | $R^2$  |
|---------|----------------------------------------|-----------------------------------------------------|-------------------------------------|--------|--------|--------|--------|--------|
|         |                                        |                                                     | 20 °C                               | 25 °C  | 30 °C  | 35 °C  | 40 °C  |        |
| CR      | -22.31                                 | -13.02                                              | -18.11                              | -18.44 | -18.33 | -18.02 | -17.22 | 0.9221 |
| RhB     | 40.11                                  | 193.25                                              | -16.19                              | -17.63 | -18.64 | -19.01 | -20.22 | 0.9755 |



**Table S7.** Kinetic parameters of four different models for the adsorption of CR and RhB onto MoO<sub>2</sub>/CaSO<sub>4</sub> composites.

| Kinetic models/Parameters                                       | CR     | RhB    |
|-----------------------------------------------------------------|--------|--------|
| Pseudo-first-order                                              |        |        |
| $q_e$ (exp) (mg·g <sup>-1</sup> )                               | 750.63 | 66.64  |
| $q_e$ (cal) (mg·g <sup>-1</sup> )                               | 522.60 | 23.22  |
| $k_1$ (min <sup>-1</sup> )·10 <sup>-3</sup>                     | 5.20   | 6.03   |
| $R^2$                                                           | 0.8875 | 0.9064 |
| Pseudo-second-order                                             |        |        |
| $q_e$ (cal) (mg·g <sup>-1</sup> )                               | 746.27 | 66.85  |
| $k_2$ (g·mg <sup>-1</sup> ·min <sup>-1</sup> )·10 <sup>-4</sup> | 0.25   | 9.40   |
| $R^2$                                                           | 0.9508 | 0.9992 |
| Elovich                                                         |        |        |
| $\alpha$ (mg·g <sup>-1</sup> ·min <sup>-1</sup> )               | 239.83 | 46.75  |
| $\beta$ (g·mg <sup>-1</sup> )·10 <sup>-3</sup>                  | 11.08  | 116.95 |
| $R^2$                                                           | 0.8007 | 0.9225 |
| Intra-particle diffusion                                        |        |        |
| $k_{1d}$ (mg·g <sup>-1</sup> ·min <sup>-1/2</sup> )             | 126.93 | 12.31  |
| $C_1$                                                           | 0      | 0      |
| $(R_1)^2$                                                       | 1.0000 | 1.0000 |
| $K_{2d}$ (mg·g <sup>-1</sup> ·min <sup>-1/2</sup> )             | 18.64  | 3.77   |
| $C_2$                                                           | 266.77 | 20.20  |
| $(R_2)^2$                                                       | 0.8897 | 0.9124 |
| $K_{3d}$ (mg·g <sup>-1</sup> ·min <sup>-1/2</sup> )             | 6.61   | 0.53   |
| $C_3$                                                           | 568.79 | 53.79  |
| $(R_3)^2$                                                       | 0.9492 | 0.9784 |
